# Supplementary material
Source: PubMed Central journal article supplement (PMC6633390)
Supplement: joces-132-228791-s1.pdf [file joces-132-228791-s1.pdf]

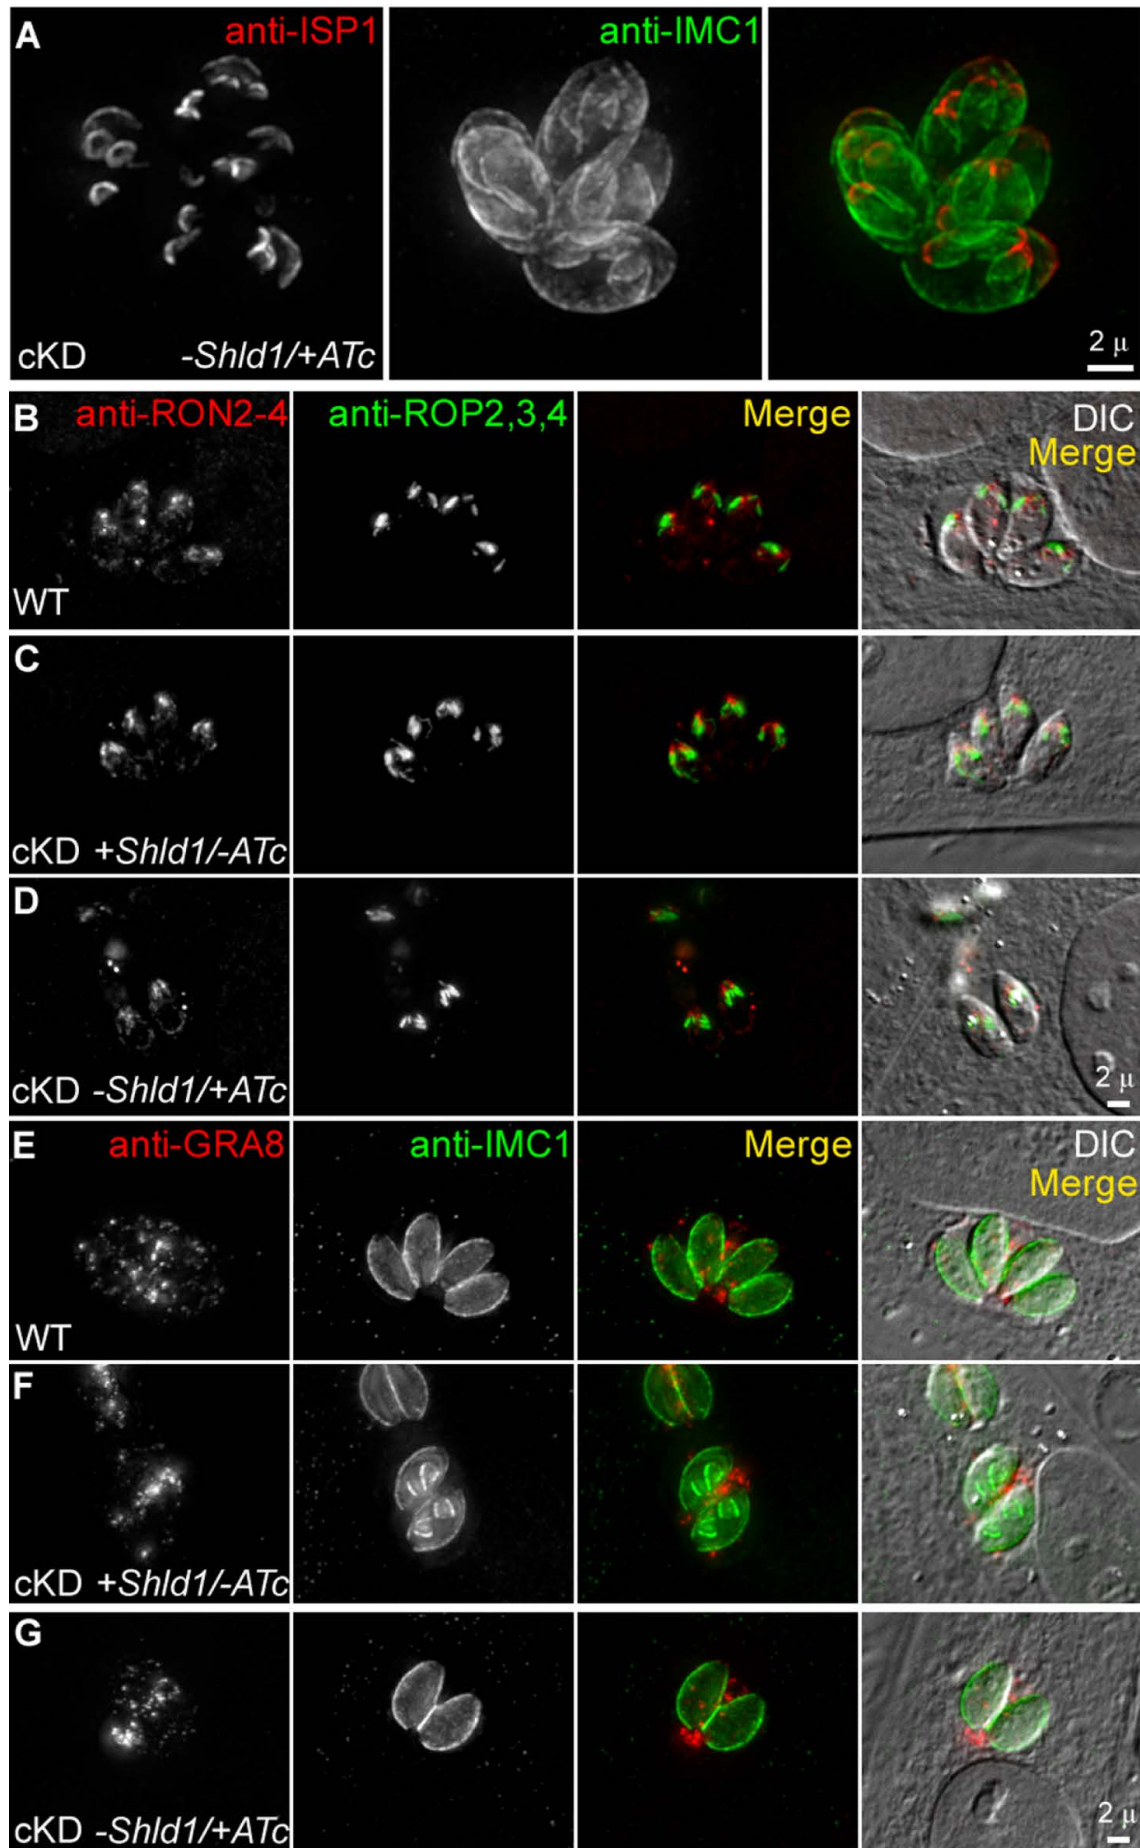

**Figure S1.** CEN2 depletion does not affect the distribution of ISP1, rhoptries, or dense granules. (A) Images of cKD parasites treated for 120 h with ATc (-Shld1/+ATc), labeled with antibodies for ISP1 (red), a marker for the apical cap, and IMC1 (green), a marker for the cortex of mature and daughter parasites. Scale bar = 2  $\mu$ m.

(B-D) Images of RH $\Delta$ *hx* parasites (WT, B), and cKD parasites cultured with Shld1 (+Shld1/-ATc, C), or treated for 48 h with ATc (-Shld1/+ATc, D), labeled with antibodies for the rhoptries. Red: anti-RON2-4, a marker for the rhoptry neck. Green: anti-ROP2,3,4, markers for the rhoptry bulb. Scale bars = 2  $\mu$ m.

(E-G) Images of RH $\Delta$ *hx* parasites (WT, E), and cKD parasites cultured with Shld1 (+Shld1/-ATc, F), or treated for 48 h with ATc (-Shld1/+ATc, G), labeled with antibodies for GRA8 (red), a marker for the dense granules, and IMC1 (green). Scale bars = 2  $\mu$ m.

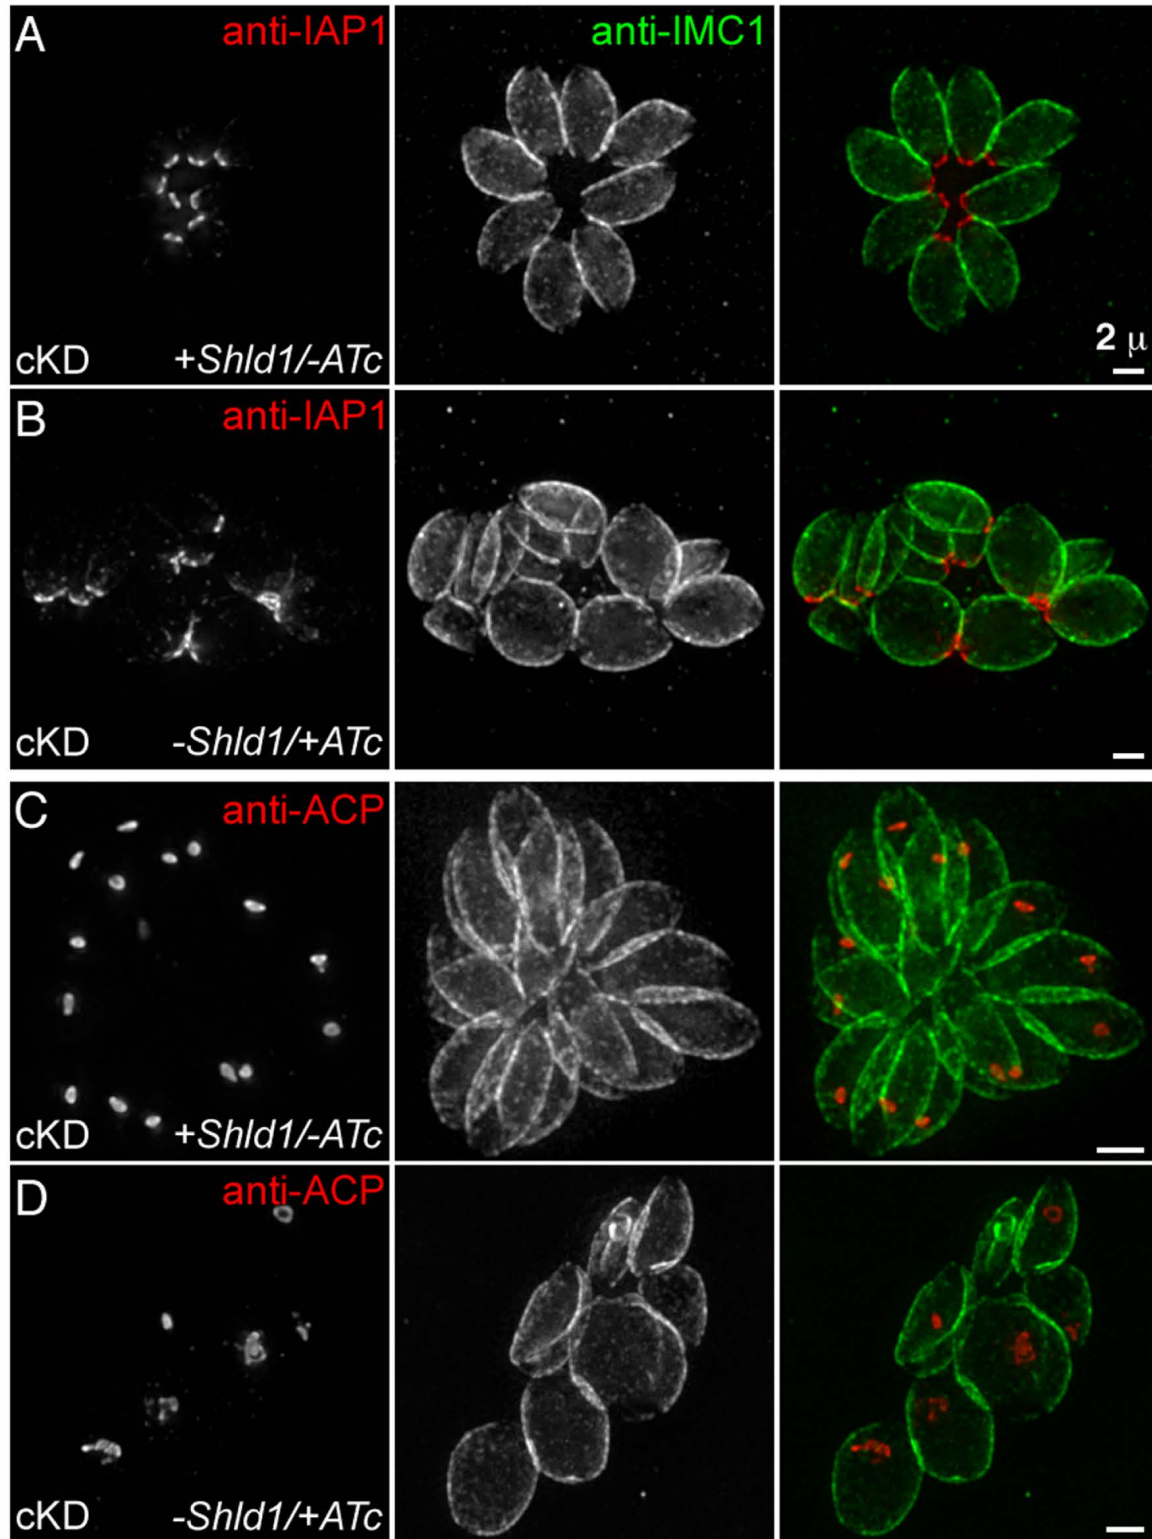

**Figure S2.** CEN2 depletion does not have a major impact on construction of the basal complex or inheritance of the apicoplast. Representative images of cKD parasites cultured with Shld1 (+Shld1/-ATc, A&C) or treated with ATc (-Shld1/+ATc) for 84 h (B) or 87 h (D). The parasites were labeled with antibodies for IMC1 (green), and IAP1 (A&B, red), a marker for the basal complex, or acyl carrier protein (ACP, C&D, red), a marker for the apicoplast. Scale bars = 2 μm.

**Table S1. Primers used in this study.**

| <b>Name</b> | <b>Sequence (5' to 3')</b>                     |
|-------------|------------------------------------------------|
| S1          | ACTGGCTAGCCAAGGCTGTTCGATTCAACAGAGAGC           |
| S2          | AGTCGCGGCCCGCCTCGCACTTTTCGCAGGGCATCTTG         |
| S3          | CGATGGATCCCAGCGAGGAGCACTGCGAGGGGGCGAG          |
| S4          | CTAAAGGGAACAAAAGCTGGGTACCGGTACCGGGCCCCCCTCG    |
| S5          | CTCCGGCTTGCAACCAAGGACCCGTAATACGACTCACTATAGGGC  |
| S6          | ATCGAGGACCCCTGATGAACTTGGCTTATTCAT              |
| S7          | GCGCAGATCTGCCAATTTACTGACCGTACACC               |
| S8          | CAGCGAGGAGCACTGCGAGG                           |
| S9          | GATCGCTTCTCGGTTCCCTACCCTG                      |
| AS1         | ACTGGGGCCCCCTGTGCCCCAAAATGTACCGGAGGC           |
| AS2         | ACTGGAATTCGCTCGACAAAAAAGGCCAAATGTA             |
| AS3         | ACGTCTTAAGTCACGGGAAAGTCTTCTTGGTCATGATCG        |
| AS4         | CTGCAGGAATTCGATATCAAGCTTAACCGGTTGACTAAAACAAC   |
| AS5         | CGCCCTTGCTCACCATTTTGCTAGCTTTGTCGAAAAGGGGAATTCG |
| AS6         | ATCGGCTAGCGGATCTAAAAGGGAAT                     |
| AS7         | GCGCCTTAAGCTAGGTGGCGACCGGTCCATCGCCAT           |
| AS8         | CAGCTTCGCGGTAATGGCGT                           |
| AS9         | CCTGTTACGAACGCAAAGATGTGT                       |
